# Supplementary material
Source: PubMed Central journal article supplement (PMC9010234)
Supplement: mmc1.pdf [file mmc1.pdf]

**Supplemental information**

**SARS-CoV-2 variants C.1.2 and B.1.621 (Mu)**

**partially evade neutralization by antibodies**

**elicited upon infection or vaccination**

**Prerna Arora, Amy Kempf, Inga Nehlmeier, Luise Graichen, Martin S. Winkler, Martin Lier, Sebastian Schulz, Hans-Martin Jäck, Anne Cossmann, Metodi V. Stankov, Georg M.N. Behrens, Stefan Pöhlmann, and Markus Hoffmann**

**Supplementary Table 1: COVID-19 patient data (Related to Figure 2).**

| <b>ID</b> | <b>Age group (y)</b> | <b>Gender</b> | <b>WHO classification upon ICU admission (mild, moderate, severe, critical)</b> | <b>Time between symptom onset and sample collection (d)</b> | <b>Time between ICU admission and sample collection (d)</b> | <b>SARS-CoV-2 PANGO lineage</b> |
|-----------|----------------------|---------------|---------------------------------------------------------------------------------|-------------------------------------------------------------|-------------------------------------------------------------|---------------------------------|
| <b>15</b> | 65-74                | M             | critical                                                                        | unknown                                                     | 8                                                           | unknown                         |
| <b>18</b> | 65-74                | F             | critical                                                                        | unknown                                                     | unknown                                                     | unknown                         |
| <b>20</b> | 55-64                | M             | critical                                                                        | unknown                                                     | unknown                                                     | unknown                         |
| <b>22</b> | 25-34                | F             | critical                                                                        | unknown                                                     | unknown                                                     | unknown                         |
| <b>23</b> | 65-74                | F             | severe                                                                          | unknown                                                     | unknown                                                     | unknown                         |
| <b>24</b> | 55-64                | M             | critical                                                                        | unknown                                                     | unknown                                                     | unknown                         |
| <b>27</b> | 45-54                | M             | critical                                                                        | unknown                                                     | 8                                                           | unknown                         |
| <b>33</b> | 75-84                | M             | critical                                                                        | unknown                                                     | 8                                                           | unknown                         |
| <b>51</b> | 65-74                | M             | critical                                                                        | unknown                                                     | 8                                                           | unknown                         |
| <b>56</b> | 65-74                | M             | critical                                                                        | unknown                                                     | 1                                                           | unknown                         |

Abbreviation: ICU = intensive care unit; d = days; y = years; M = Male; F = Female

**Supplementary Table 2: Vaccinated patient data (Related to Figure 2).**

| <b>ID</b>   | <b>Age group (y)</b> | <b>Gender</b> | <b>1<sup>st</sup> vaccination</b> | <b>2<sup>nd</sup> vaccination</b> | <b>Time between 1<sup>st</sup> &amp; 2<sup>nd</sup> vaccination (d)</b> | <b>Time since 2<sup>nd</sup> vaccination (d)</b> |
|-------------|----------------------|---------------|-----------------------------------|-----------------------------------|-------------------------------------------------------------------------|--------------------------------------------------|
| <b>L3</b>   | 25-34                | F             | BNT162b2 (BNT)                    | BNT162b2 (BNT)                    | 21                                                                      | 198                                              |
| <b>L4</b>   | 35-44                | F             | BNT162b2 (BNT)                    | BNT162b2 (BNT)                    | 21                                                                      | 197                                              |
| <b>L9</b>   | 35-44                | M             | BNT162b2 (BNT)                    | BNT162b2 (BNT)                    | 21                                                                      | 197                                              |
| <b>L11</b>  | 18-24                | M             | BNT162b2 (BNT)                    | BNT162b2 (BNT)                    | 23                                                                      | 190                                              |
| <b>L12</b>  | 18-24                | F             | BNT162b2 (BNT)                    | BNT162b2 (BNT)                    | 21                                                                      | 199                                              |
| <b>L13</b>  | 18-24                | F             | BNT162b2 (BNT)                    | BNT162b2 (BNT)                    | 21                                                                      | 204                                              |
| <b>L16</b>  | 18-24                | F             | BNT162b2 (BNT)                    | BNT162b2 (BNT)                    | 42                                                                      | 72                                               |
| <b>L22</b>  | 18-24                | M             | BNT162b2 (BNT)                    | BNT162b2 (BNT)                    | 21                                                                      | 199                                              |
| <b>L25</b>  | 18-24                | M             | BNT162b2 (BNT)                    | BNT162b2 (BNT)                    | 21                                                                      | 199                                              |
| <b>L26</b>  | 18-24                | M             | BNT162b2 (BNT)                    | BNT162b2 (BNT)                    | 21                                                                      | 186                                              |
| <b>6365</b> | 25-34                | F             | ChAdOx1-SARS-COV-2 (AZ)           | ChAdOx1-SARS-COV-2 (AZ)           | 74                                                                      | 42                                               |
| <b>6205</b> | 55-64                | F             | ChAdOx1-SARS-COV-2 (AZ)           | ChAdOx1-SARS-COV-2 (AZ)           | 71                                                                      | 27                                               |
| <b>6239</b> | 55-64                | F             | ChAdOx1-SARS-COV-2 (AZ)           | ChAdOx1-SARS-COV-2 (AZ)           | 75                                                                      | 27                                               |
| <b>6297</b> | 45-54                | F             | ChAdOx1-SARS-COV-2 (AZ)           | ChAdOx1-SARS-COV-2 (AZ)           | 81                                                                      | 29                                               |
| <b>6243</b> | 55-64                | F             | ChAdOx1-SARS-COV-2 (AZ)           | ChAdOx1-SARS-COV-2 (AZ)           | 79                                                                      | 30                                               |
| <b>6262</b> | 55-64                | F             | ChAdOx1-SARS-COV-2 (AZ)           | ChAdOx1-SARS-COV-2 (AZ)           | 71                                                                      | 30                                               |
| <b>6272</b> | 55-64                | F             | ChAdOx1-SARS-COV-2 (AZ)           | ChAdOx1-SARS-COV-2 (AZ)           | 80                                                                      | 32                                               |
| <b>6321</b> | 25-34                | F             | ChAdOx1-SARS-COV-2 (AZ)           | ChAdOx1-SARS-COV-2 (AZ)           | 77                                                                      | 33                                               |
| <b>6358</b> | 25-34                | F             | ChAdOx1-SARS-COV-2 (AZ)           | ChAdOx1-SARS-COV-2 (AZ)           | 92                                                                      | 33                                               |
| <b>6236</b> | 55-64                | F             | ChAdOx1-SARS-COV-2 (AZ)           | ChAdOx1-SARS-COV-2 (AZ)           | 76                                                                      | 34                                               |

Abbreviation: d = days; y = years; M = Male; F = Female

**Supplementary Table 3: Primers used for cloning (Related to STAR Methods).**

| Primer name                                | Sequence                                                   |
|--------------------------------------------|------------------------------------------------------------|
| SARS-2-S (BamHI) F                         | AAGGCCGGATCCGCCACCATGTTCTGTTTCTGGTGCTGC                    |
| SARS-2-S $\Delta$ 18 (XbaI) R              | AAGGCCCTCTAGACTACTTGCAGCAGCTGCCACAG                        |
| SARS-2-S (P9L) F                           | GTTTCTGGTGCTGCTGCTTCTGGTGTCCAGCCAG                         |
| SARS-2-S (P9L) R                           | CTGGCTGGACACCAGAAGCAGCAGCACCAGAAAC                         |
| SARS-2-S (C136F) F                         | GCGAGTTCAGTTCTTCAACGACCCCTTCCTG                            |
| SARS-2-S (C136F) R                         | CAGGAAGGGGTCGTTGAAGAAGTGGAACTCGC                           |
| SARS-2-S (R190S) F                         | CAAGAACCTGAGCGAGTTCGTGTTT                                  |
| SARS-2-S (R190S) R                         | ACACGAACTCGCTCAGGTTCTTGAAG                                 |
| SARS-2-S (D215G) F                         | CAACCTCGTGCGGGGTCTGCCTCAGGGCTTC                            |
| SARS-2-S (D215G) R                         | GAAGCCCTGAGGCAGACCCCGCACGAGGTTG                            |
| SARS-2-S (Y449H) F                         | CAAAGTCGGCGGCAACCACAATTACCTGTACC                           |
| SARS-2-S (Y449H) R                         | GGTACAGGTAATTGTGGTTGCCGCCGACTTTG                           |
| SARS-2-S (E484K) F                         | TAACGGCGTGAAAGGCTTCAACTGCTACTTC                            |
| SARS-2-S (E484K) R                         | TGAAGCCTTTCACGCCGTTACAAGG                                  |
| SARS-2-S (N501Y) F                         | TCAGCCACATATGGCGTGGGCTATC                                  |
| SARS-2-S (N501Y) R                         | CCCACGCCATATGTGGGCTGAAAGC                                  |
| SARS-2-S (H655Y) F                         | CGGAGCCGAGTACGTGAACAATAGC                                  |
| SARS-2-S (H655Y) R                         | TGTTACGTAICTCGGCTCCGATCAGAC                                |
| SARS-2-S (N679K) F                         | CCAGACACAGACAAAGAGCCCCAGACGGGCCAG                          |
| SARS-2-S (N679K) R                         | CTGGCCCGTCTGGGGCTCTTTGTCTGTGTCTGG                          |
| SARS-2-S (T716I) F                         | CTATCCCCATCAACTTCACCATCAGC                                 |
| SARS-2-S (T716I) R                         | GTGAAGTTGATGGGGATAGCGATAGAGTTG                             |
| SARS-2-S (P25L) F                          | CAAGAACCCAGCTGCTTCCAGCCTACACCAAC                           |
| SARS-2-S (P25L) R                          | GTTGGTGTAGGCTGGAAGCAGCTGGGTTCTTG                           |
| SARS-2-S (Y144 $\Delta$ /W152R) F          | CCTTCCTGGGCGTCTATCACAAGAACAACAAGAGCCGGATGGAAAGCGAG<br>TTCC |
| SARS-2-S (Y144 $\Delta$ /W152R) R          | GGAACTCGCTTTCATCCGGCTCTTGTGTTCTTGTGATAGACGCCCAGGAA<br>GG   |
| SARS-2-S (A243 $\Delta$ /L244 $\Delta$ ) F | GGTTTCAGACACTGCTGCACAGAAGCTACCTG                           |
| SARS-2-S (A243 $\Delta$ /L244 $\Delta$ ) R | CAGGTAGCTTCTGTGCAGCAGTGTCTGAAACC                           |
| SARS-2-S (T478K) F                         | CTATCAGGCCGGCAGCAAACCTTGTAACGGCGTG                         |
| SARS-2-S (T478K) R                         | CACGCCGTTACAAGGTTTGCTGCCGGCCTGATAG                         |
| SARS-2-S (T859N) F                         | GAAGTTTAACGGACTGAACGTGCTGCCACCACTG                         |
| SARS-2-S (T859N) R                         | CAGTGGTGGCAGCACGTTCACTCCGTTAAACTTC                         |
| SARS-2-S (A879T) F                         | CACATCTGCCCTGCTGACCGGCACAATCACAAG                          |
| SARS-2-S (A879T) R                         | CTTGTGATTGTGCCGGTCAGCAGGGCAGATGTG                          |
| SARS-2-S (T95I) F                          | GTGTACTTTGCCAGCATCGAGAAGTCCAACATC                          |
| SARS-2-S (T95I) R                          | GATGTTGGACTTCTCGATGCTGGCAAAGTACAC                          |
| SARS-2-S (Y144S/Y145N) F                   | CCTTCCTGGGCGTCTCCAATCACAAGAACAACAAG                        |
| SARS-2-S (Y144S/Y145N) R                   | CTTGTGTTCTTGTGATTGGAGACGCCCAGGAAGG                         |
| SARS-2-S (R346K) F                         | GTGTTCAATGCCACCAAATTCGCCTCTGTGTAC                          |
| SARS-2-S (R346K) R                         | GTACACAGAGGCGAATTTGGTGGCATTGAACAC                          |
| SARS-2-S (P681H) F                         | GACAAACAGCCACAGACGGGCCAGATCTG                              |
| SARS-2-S (P681H) R                         | GGCCCGTCTGTGGCTGTTTGTCTGTGTC                               |
| SARS-2-S (D950N) F                         | AAGCTGCAGAACGTGGTCAACCAGAATGCCCAGG                         |
| SARS-2-S (D950N) R                         | TGACCACGTTCTGCAGCTTTCAGGGGCGCTTGC                          |
| SARS-2-S Seq-01                            | CAAGATCTACAGCAAGCACACC                                     |
| SARS-2-S Seq-02                            | GTCGGCGGCAACTACAATTAC                                      |
| SARS-2-S Seq-03                            | CTGTCTGATCGGAGCCGAGCAC                                     |
| SARS-2-S Seq-04                            | TGAGATGATCGCCAGTACAC                                       |
| SARS-2-S Seq-05                            | GCCATCTGCCACGACGGCAAAG                                     |
| pCG1 F                                     | CCTGGGCAACGTGCTGGT                                         |
| pCG1 R                                     | GTCAGATGCTCAAGGGGCTTCA                                     |

**Figure S1**

**A)**

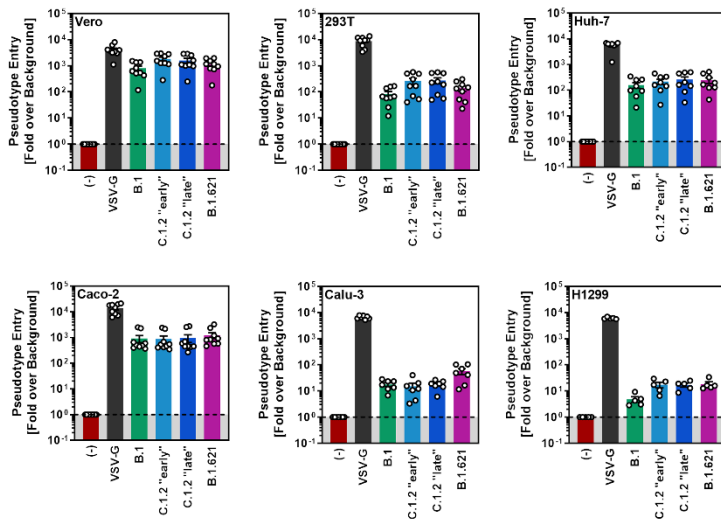

**B)**

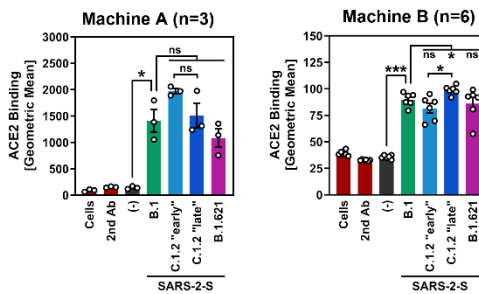

**C)**

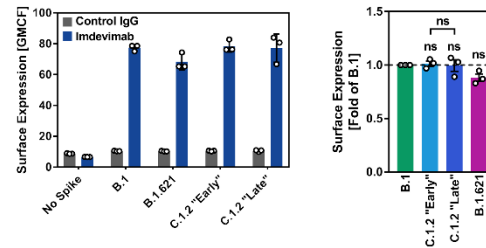

**D)**

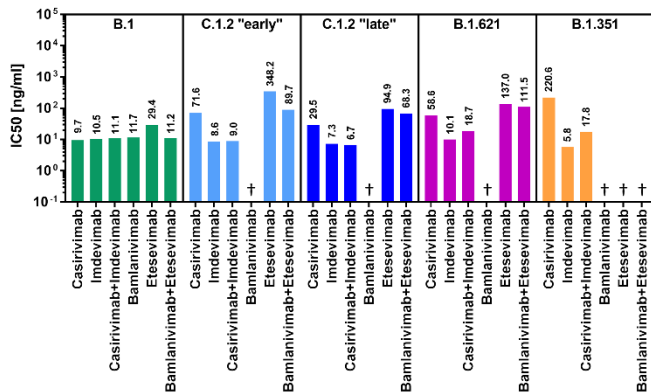

**Supplementary Figure 1 (Related to Figures 1 and 2):**

(A) Pseudotype entry data presented in Figure 1E normalized against the assay background. The experiment was performed as described in the legend of Figure 1E with the difference that pseudotype entry was normalized against signals obtained from cells inoculated with particles bearing no viral glycoprotein (background, set as 1). Further, entry of particles bearing VSV-G is shown. Error bars indicate the standard error of the mean (SEM).

(B) Unprocessed data on ACE2 binding analyzed by flow cytometry (related to Figure 2C). 293T expressing the indicated S proteins following transfection were incubated with soluble ACE2 (ACE2 ectodomain fused to an Fc-tag derived from human IgG) and AlexaFluor-488-conjugated anti-human antibody and analyzed flow cytometry. The

following samples served as controls: (i) untransfected and unstained cells (Cells), (ii) empty vector-transfected cells incubated only with secondary antibody (2nd Ab), (iii) empty vector-transfected cells incubated with soluble ACE2 and secondary antibody (-). Efficiency of ACE2 binding was assessed by measuring the geometric mean channel fluorescence at 488 nm. Shown are the average (mean) data from three (left panel, machine A, ID7000 Spectral Analyser, Sony) and six (right panel, machine B, LSR II flow cytometer, BD Biosciences) biological replicates (each performed with single samples). Error bars indicate the standard deviation (SD). Statistical significance of differences in ACE2 binding was analyzed by two-tailed Students t-test with Welch's correction ( $p > 0.05$ , ns;  $p < 0.05$ , \*;  $p < 0.01$ , \*\*;  $p < 0.001$ , \*\*\*).

(C) Cell surface expression of the indicates S proteins in transfected 293T cells was analyzed by flow cytometry using the monoclonal anti-SARS-CoV-2 S antibody Imdevimab and AlexaFluor-488-conjugated anti-human secondary antibody (related to Figure 2C). Samples incubated with a control human isotype antibody (control IgG) instead of Imdevimab served as controls. Shown are the average (mean) data from three biological replicates that were each performed with single samples (left panel) or the respective normalized data ( $B.1 = 1$ , right panel). Error bars indicate the SD (left panel) or the SEM (right panel). Statistical significance of differences in S protein surface expression was analyzed by two-tailed Students t-test with Welch's correction ( $p > 0.05$ , not significant [ns]).

(D) mAb concentrations that reduce S protein-driven cell entry by 50% (inhibitory concentration 50, IC50) calculated based on the data presented in Fig. 2E.

Figure S2

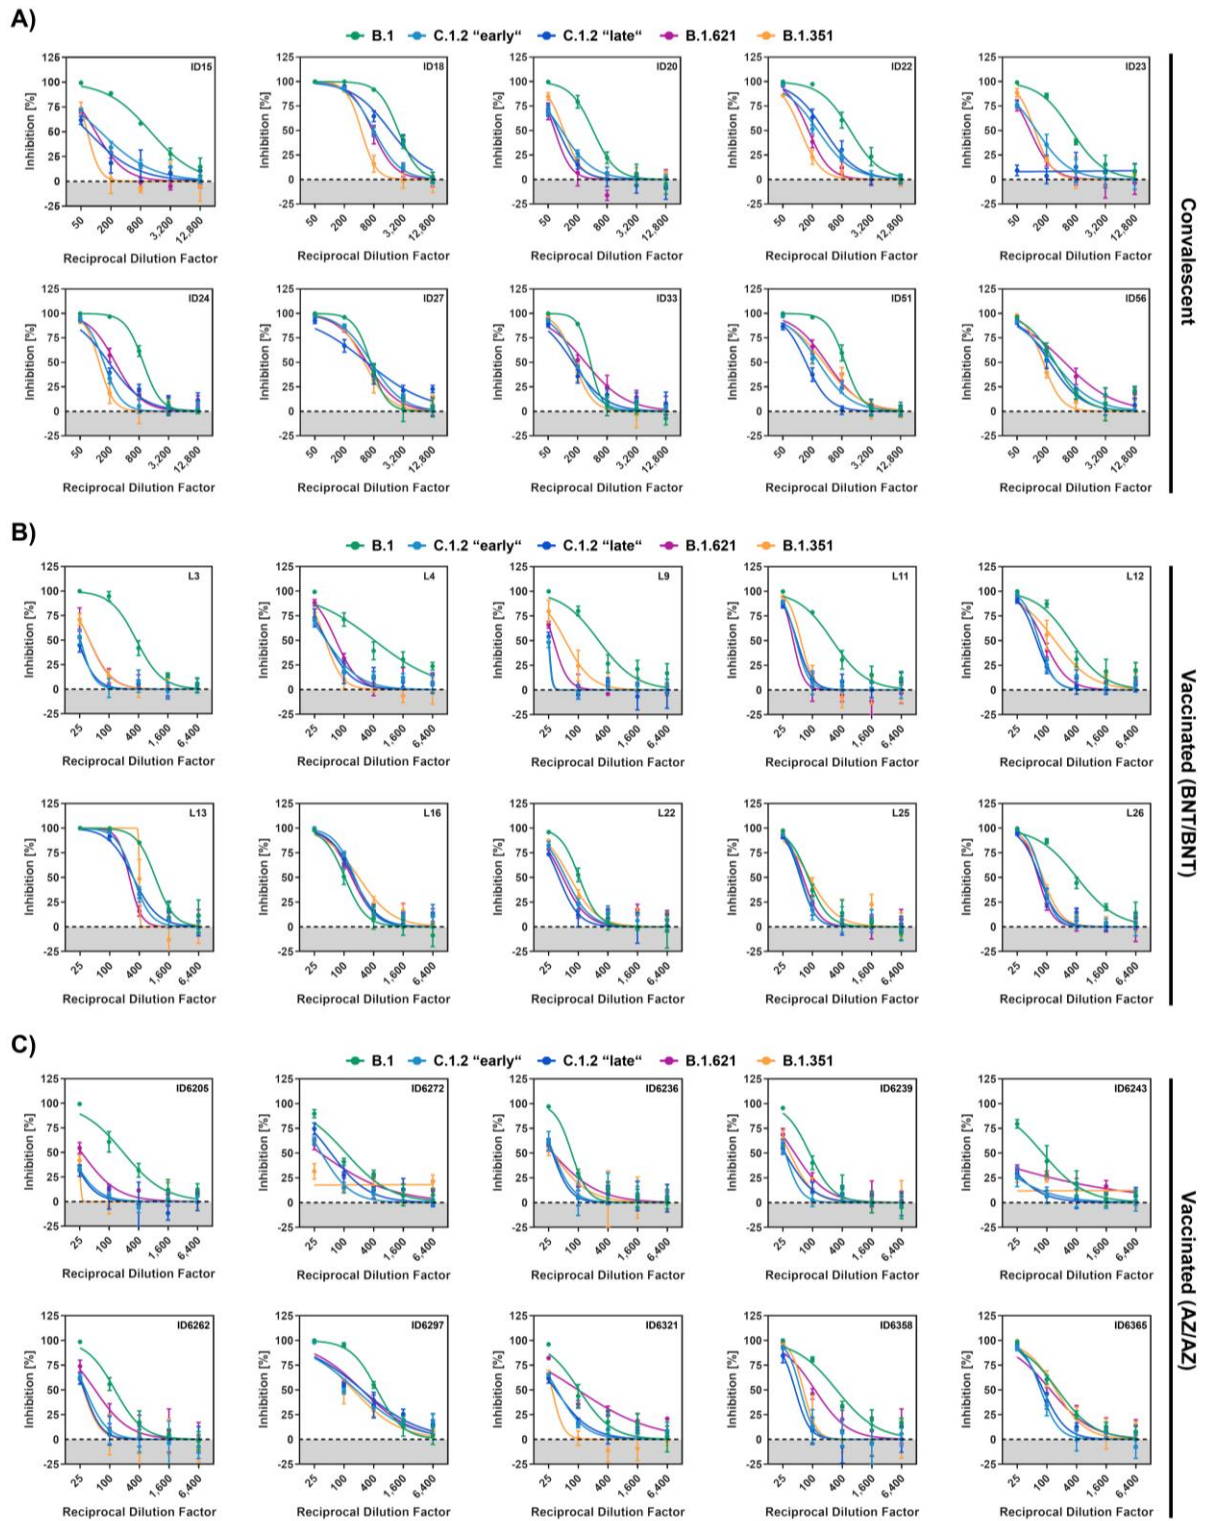

Supplementary Figure 2: Individual neutralization data (Related to Figure 2).

Presented are the individual neutralization results for the data presented in Figure 2F (convalescent), 2G (AZ/AZ-vaccinated) and 2H (BNT/BNT-vaccinated). All data show the mean values of four technical replicates with error bars indicating the standard deviation. The curves were calculated based on a non-linear regression model with variable slope.
